# Supplementary material for: Nanostructured BiOI–GO composite: facile room temperature synthesis with enhanced multifunctionality in field emission and photocatalytic activity
Source: Royal Society of Chemistry journal article supplement (doi:10.1039/c6ra13471h), 2016-01-01
Supplement: c6ra13471h1.pdf [file c6ra13471h1.pdf]

Journal Name

ARTICLE

## Electronic Supporting information

### Scheme 1

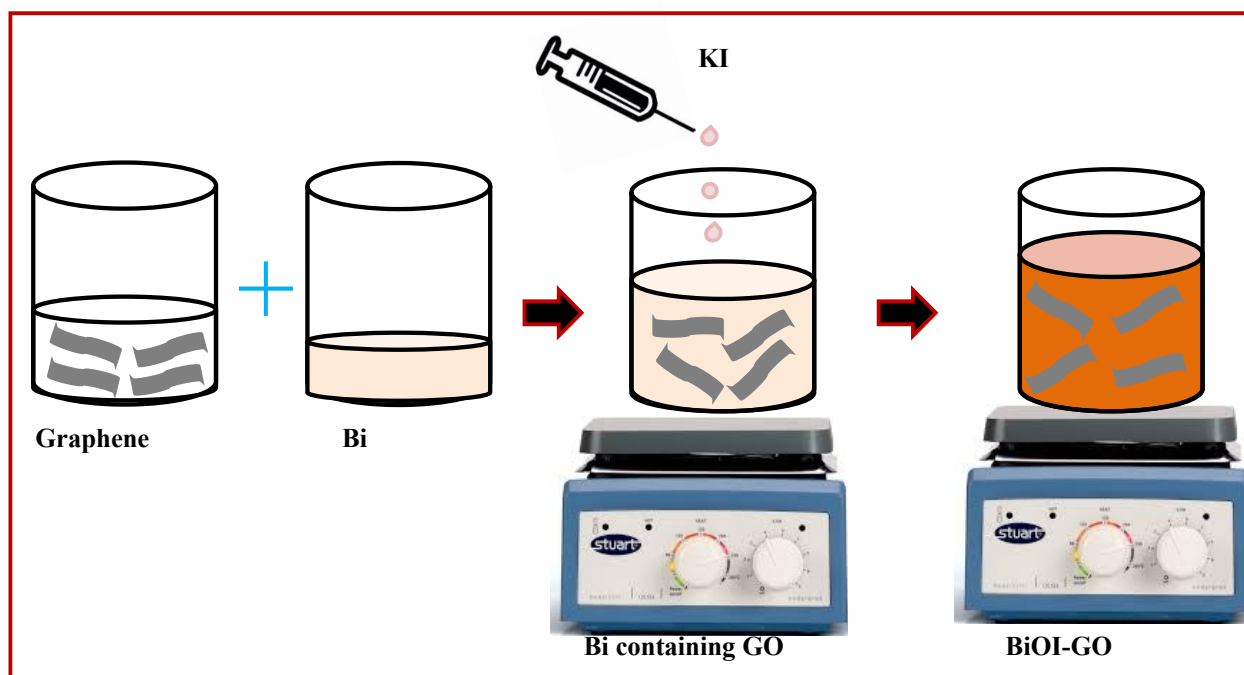

**Scheme 1** Reaction schematic of BiOI-GO nanocomposite.

## ESI Figure 1

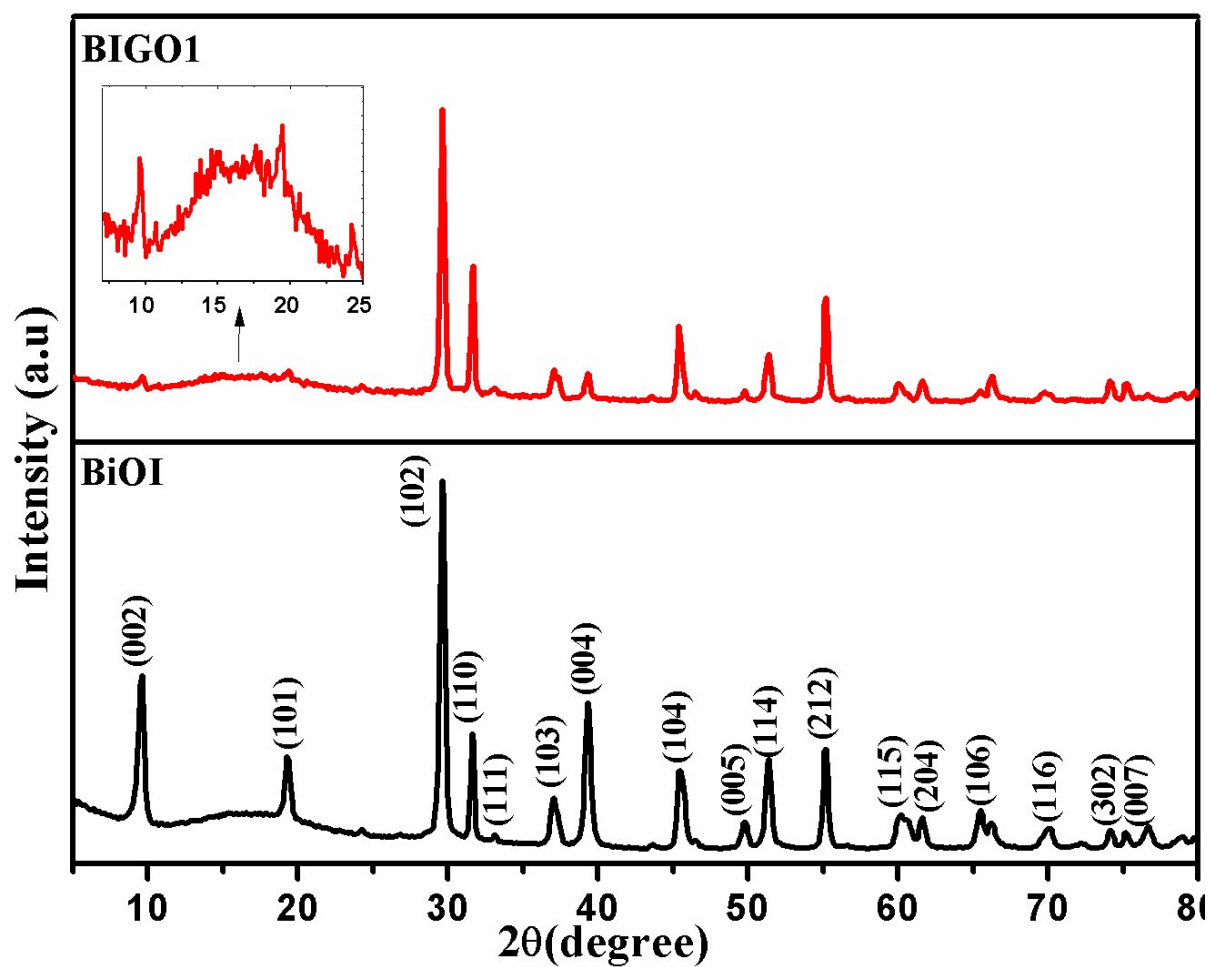

Figure 1 XRD pattern of BiOI (black in colour) and BIGO1 (red in colour).

## ESI Figure 2

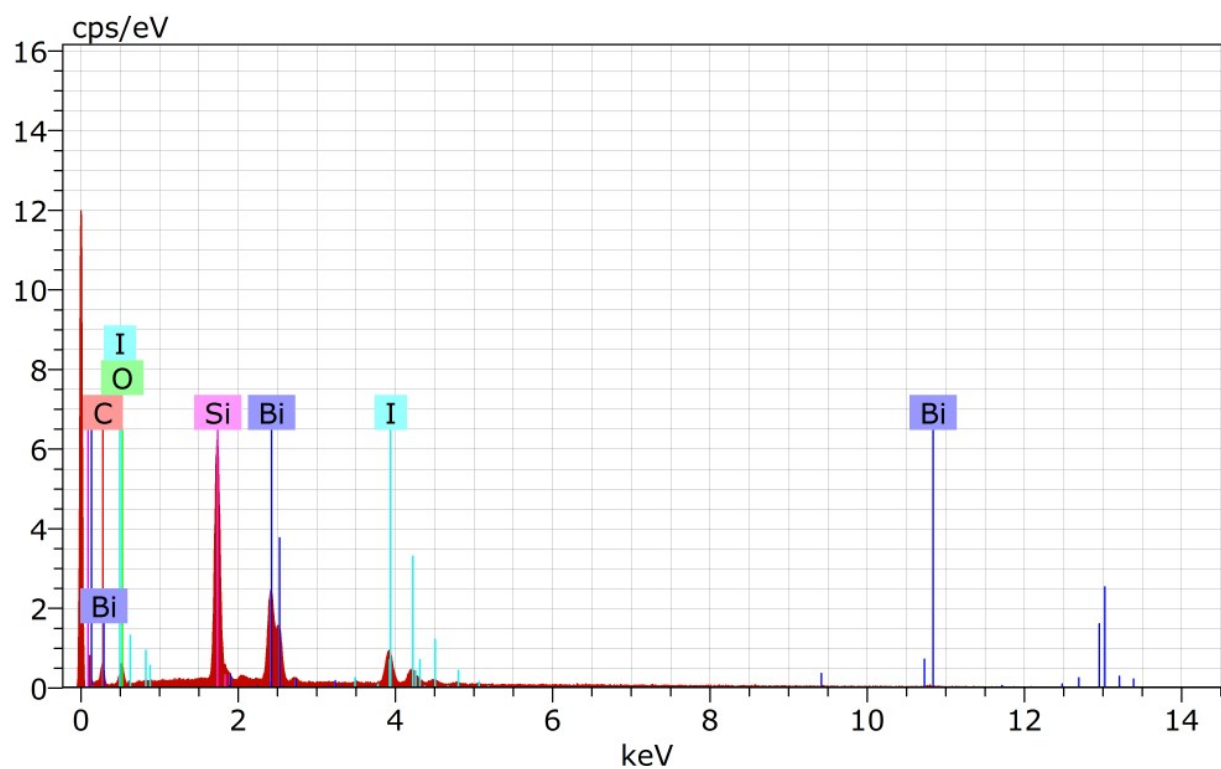

**Figure 2** EDS Spectrum of the BIGO1 nanocomposite.

## ESI Figure 3

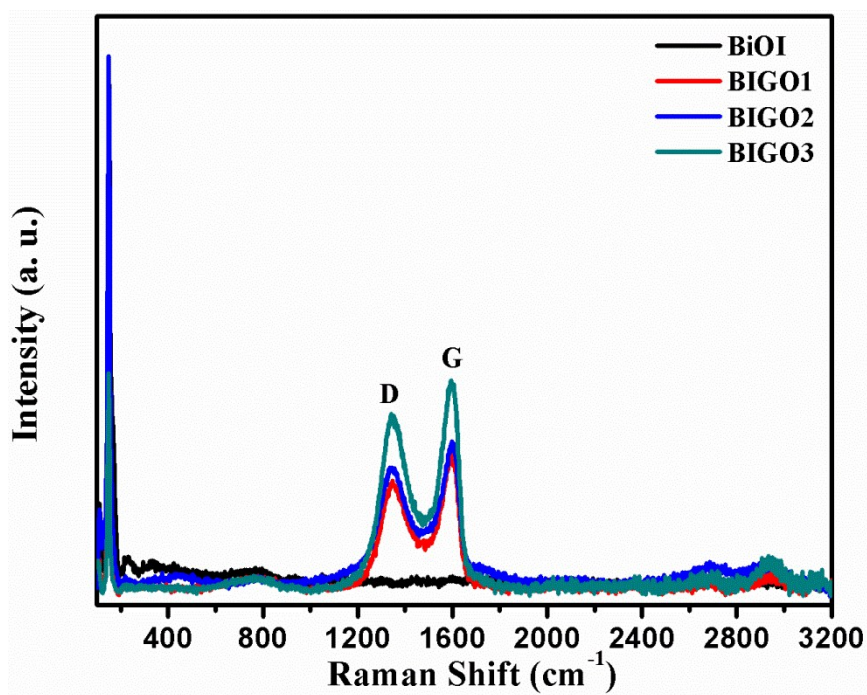

Figure 3 Raman spectrums of as-synthesized samples.

## ESI Figure 4

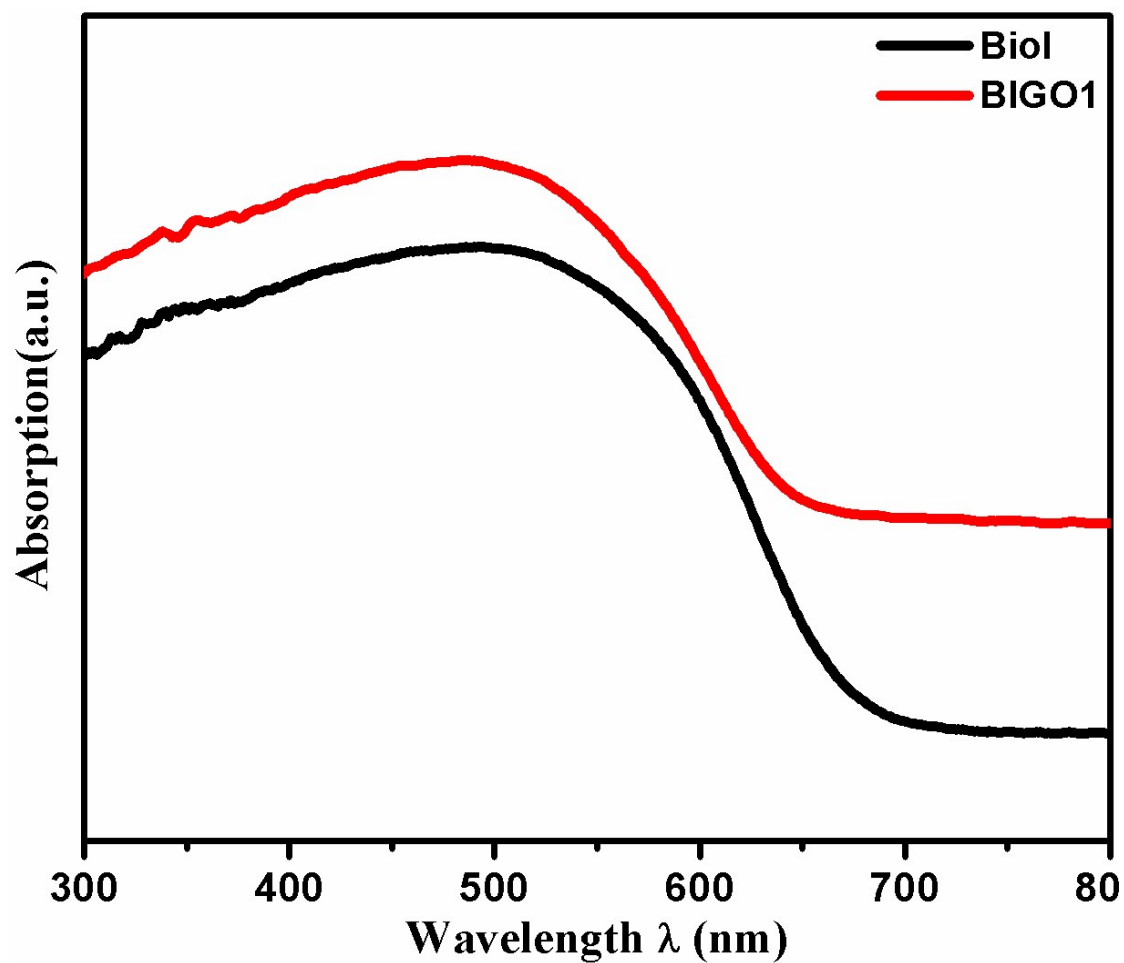

**Figure 4** UV-vis spectrum of BiOI (black in color) and BIGO1 nanocomposites (red in color).

## ESI Figure 5

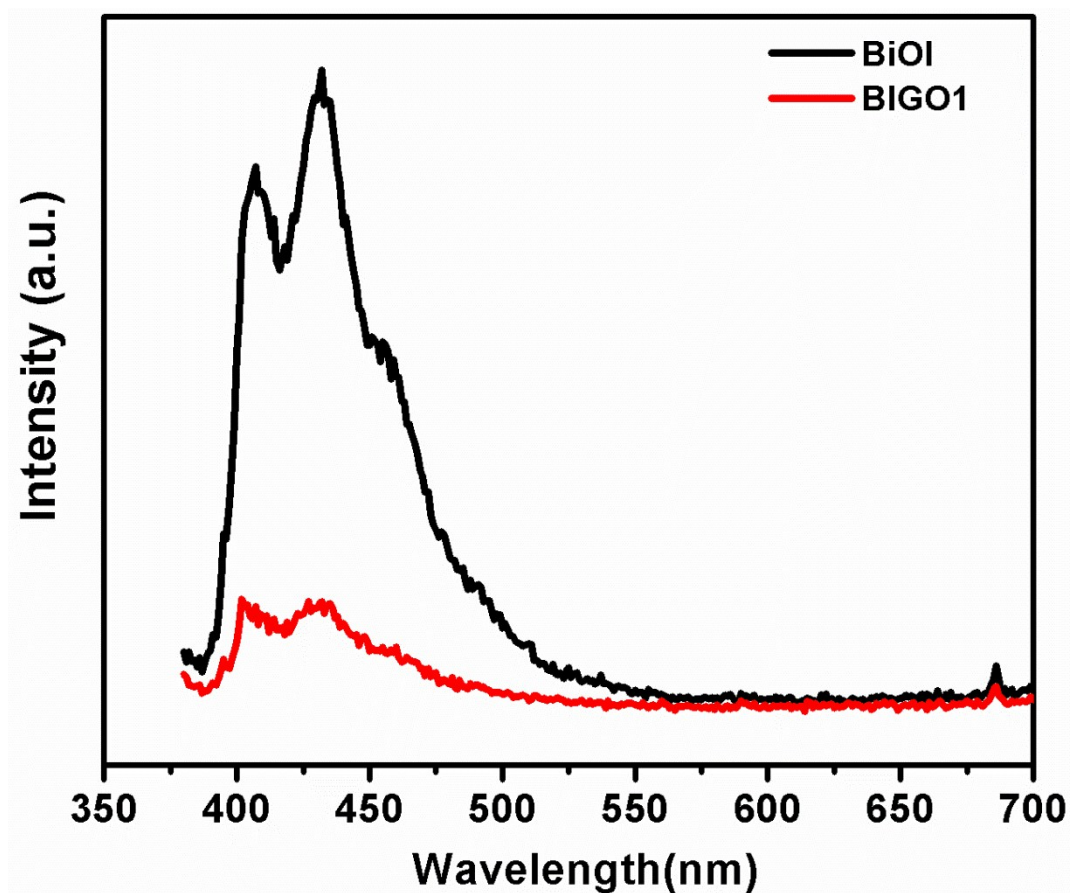

Figure 5 PL spectrum of BiOI (black in color) and BIGO1 nanocomposites (red in color).

## ESI Figure 6

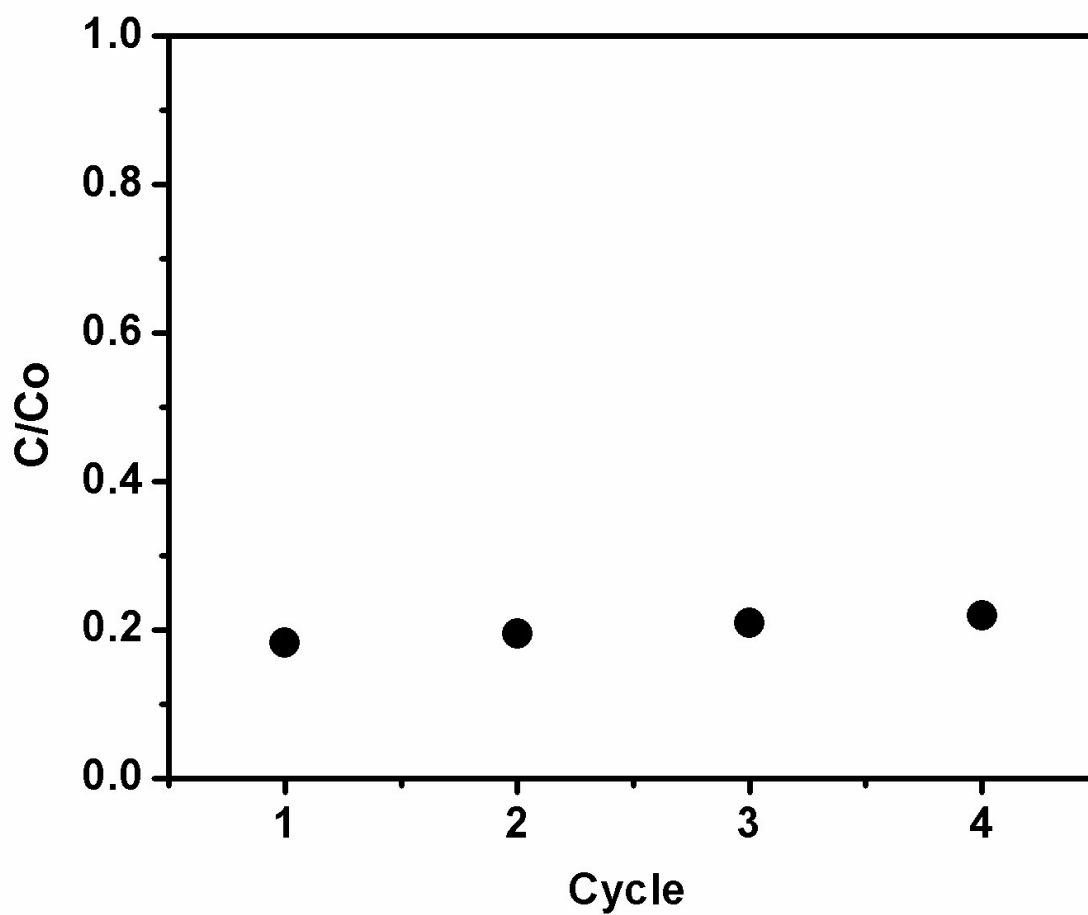

**Figure 6** Photocatalytic stability of BIGO1 sample on the degradation of MO under visible light irradiation.

## ESI Figure 7

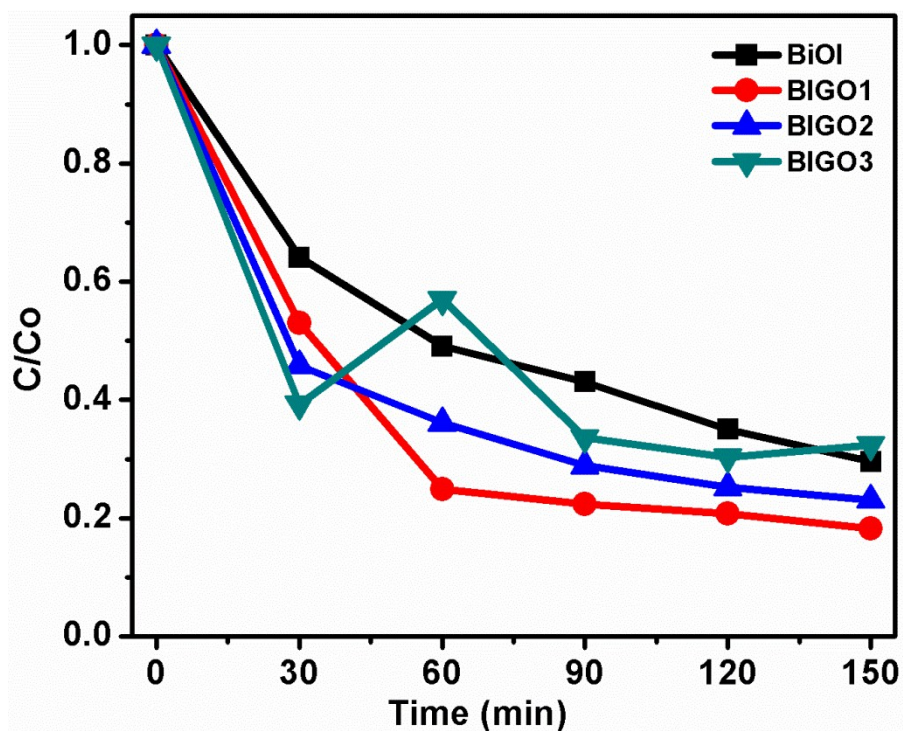

**Figure 7** Photocatalytic activities of BiOI and BiOI–GO nanocomposites samples on the degradation of MO under visible light irradiation.
